# Supplementary material for: Detection of trace metallic elements in oral lichenoid contact lesions using SR-XRF, PIXE, and XAFS
Source: PubMed Central journal article supplement (PMC4471725; doi:10.1038/srep10672), 2015-06-18
Supplement: srep10672-s1.pdf [file srep10672-s1.pdf]

## Supporting Information

### Detection of trace metallic elements in oral lichenoid contact lesions using SR-XRF, PIXE, and XAFS

Tomoko Sugiyama, Motohiro Uo\*, Takahiro Wada, Daisuke Omagari, Kazuo Komiyama, Serika Miyazaki, Chiya Numako, Tadahide Noguchi, Yoshinori Jinbu, Mikio Kusama, Yoshiyuki Mori

**Table S1** Fluorescence X-ray counts (cps) of each element shown in Table 2 and the detailed measurement conditions

| No. | Diagnosis |         | detected metallic elements |            |              |              |               |             |        |            |        |        | I <sub>0</sub> |            |          |          |
|-----|-----------|---------|----------------------------|------------|--------------|--------------|---------------|-------------|--------|------------|--------|--------|----------------|------------|----------|----------|
|     |           |         | intrinsic                  |            |              |              | non-intrinsic |             |        |            |        |        | KEK-PF (a)     | KEK-PF (b) | SPring-8 |          |
|     |           |         | Fe                         | Ni         | Cu           | Zn           | Ti            | Cr          | Pd     | Ag         | Au     | In     | Bi             |            |          |          |
| #C1 | Control   | Max     | 77                         | n.m.       | 12           | 46           | n.m.          | 32          | n.m.   | 20         | n.m.   | n.m.   | n.m.           | —          | —        | 140174.4 |
|     |           | Average | 36.94±6.67                 |            | 4.65±2.18    | 5.16±3.55    |               | 16.82±4.03  |        | 9.54±3.07  |        |        |                |            |          |          |
| #C2 | Control   | Max     | 524                        | 35         | 72           | 636          | 266           | 26          | n.m.   | n.m.       | n.m.   | n.m.   | n.m.           | —          | 3075.1   | —        |
|     |           | Average | 58.21±30.97                | 10.59±3.36 | 28.73±6.17   | 107.00±64.44 | 11.08±4.75    | 9.91±3.11   |        |            |        |        |                |            |          |          |
| #C3 | Control   | Max     | 381                        | 48         | 53           | 908          | 201           | 30          | n.m.   | n.m.       | n.m.   | n.m.   | n.m.           | —          | 3479.3   | —        |
|     |           | Average | 72.75±41.20                | 12.26±3.01 | 30.96±4.79   | 41.51±7.84   | 13.69±8.62    | 12.23±2.94  |        |            |        |        |                |            |          |          |
| #1  | OLP       | Max     | μ-PIXE                     | μ-PIXE     | μ-PIXE       | μ-PIXE       | μ-PIXE        | μ-PIXE      | μ-PIXE | μ-PIXE     | μ-PIXE | μ-PIXE | μ-PIXE         | —          | —        | —        |
|     |           | Average |                            |            |              |              |               |             |        |            |        |        |                |            |          |          |
| #2  | OLP       | Max     | 230                        | 49         | 88           | 1253         | 107           | 36          | n.m.   | 12         | n.m.   | n.m.   | n.m.           | —          | 3395.3   | 140334.0 |
|     |           | Average | 98.96±11.99                | 18.87±2.72 | 75.46±4.23   | 256.00±67.80 | 24.29±2.82    | 17.86±1.99  |        | 3.19±1.82  |        |        |                |            |          |          |
| #3  | OLP       | Max     | 218                        | n.m.       | 15           | 37           | n.m.          | 31          | n.m.   | 42         | n.m.   | n.m.   | n.m.           | —          | —        | 140324.1 |
|     |           | Average | 35.95±6.87                 |            | 4.61±2.21    | 4.56±2.46    |               | 16.61±4.17  |        | 9.62±3.19  |        |        |                |            |          |          |
| #4  | OLP       | Max     | 62                         | n.m.       | 25           | 35           | n.m.          | 34          | n.m.   | 26         | n.m.   | n.m.   | n.m.           | —          | —        | 133888.3 |
|     |           | Average | 35.55±5.97                 |            | 4.21±2.09    | 3.75±2.16    |               | 16.45±4.08  |        | 9.00±2.99  |        |        |                |            |          |          |
| #5  | OLP       | Max     | 45                         | n.m.       | 12           | 24           | n.m.          | 25          | n.m.   | 20         | n.m.   | n.m.   | n.m.           | —          | —        | 145385.2 |
|     |           | Average | 28.46±4.63                 |            | 3.8±1.75     | 4.55±2.22    |               | 13.04±3.07  |        | 7.67±2.44  |        |        |                |            |          |          |
| #6  | OLP       | Max     | 1650                       | 68         | 284          | 1612         | 148           | 170         | n.m.   | n.m.       | n.m.   | n.m.   | n.m.           | —          | 3261.5   | —        |
|     |           | Average | 189.03±86.33               | 25.99±4.34 | 107.89±12.78 | 356.02±26.57 | 35.33±10.00   | 24.55±9.78  |        |            |        |        |                |            |          |          |
| #7  | OLCL      | Max     | 440                        | 9          | 385          | 2052         | 101           | 18          | μ-PIXE | μ-PIXE     | μ-PIXE | μ-PIXE | μ-PIXE         | 3092.8     | —        | —        |
|     |           | Average | 17.76±13.8                 | 1.52±0.57  | 6.75±6.00    | 24.15±16.32  | 1.99±1.59     | 1.99±0.44   |        |            |        |        |                |            |          |          |
| #8  | OLCL      | Max     | 66                         | 52         | 512          | 1104         | 53            | 63          | μ-PIXE | μ-PIXE     | μ-PIXE | μ-PIXE | μ-PIXE         | 2835.5     | —        | —        |
|     |           | Average | 7.68±3.42                  | 1.03±0.42  | 2.71±1.32    | 12.34±5.90   | 1.43±0.89     | 1.41±0.75   |        |            |        |        |                |            |          |          |
| #9  | OLCL      | Max     | 522                        | 9          | 76           | 1005         | 5             | 27          | μ-PIXE | μ-PIXE     | μ-PIXE | μ-PIXE | μ-PIXE         | 95768.4    | —        | —        |
|     |           | Average | 67.81±4.98                 | 5.30±0.99  | 59.95±3.71   | 18.07±5.40   | 2.15±0.69     | 19.86±1.89  |        |            |        |        |                |            |          |          |
| #10 | OLCL      | Max     | 162                        | 11         | 51           | 279          | 48            | 27          | + ‡    | 594        | + ‡    | n.m.   | n.m.           | 9616.6     | —        | 141630.0 |
|     |           | Average | 66.92±10.95                | 4.45±1.53  | 36.84±4.69   | 15.71±6.87   | 2.43±1.49     | 17.64±3.27  |        | 16.09±9.71 |        |        |                |            |          |          |
| #11 | OLCL      | Max     | 2412                       | 13         | 53           | 3161         | 96            | 140         | n.m.   | 33         | - ‡    | n.m.   | + ‡            | 6187.7     | —        | 147890.0 |
|     |           | Average | 42.76±7.96                 | 3.89±1.12  | 40.46±3.06   | 16.43±7.32   | 1.48±1.09     | 11.96±2.45  |        | 13.46±4.26 |        |        |                |            |          |          |
| #12 | OLCL      | Max     | 27883                      | 2082       | 3160         | 13783        | 5591          | 3922        | n.m.   | 24         | - ‡    | - ‡    | n.m.           | —          | 2977.1   | 145361.2 |
|     |           | Average | 189.48±253.50              | 18.32±2.95 | 72.44±62.94  | 235.40±45.50 | 24.74±13.12   | 19.77±57.98 |        | 9.60±3.23  |        |        |                |            |          |          |

+ ‡: fluorescent/characteristic X-ray peak was identified in the spot analysis at SPring-8.  
- ‡: fluorescent/characteristic X-ray peak was not detected at SPring-8.

Detailed measurement conditions;

**KEK-PF, BL-4A** Distance between specimen and detector : 35 mm  
 Detector: (a) Si(Li) detector (PGT Inc., 30 mm<sup>2</sup>)  
 (b) Silicon multi-cathode detector (Voltex-EX, Seiko EG&G)  
**SPring-8, BL-37XU** Distance between specimen and detector: 300 mm

To roughly estimate the metallic elements contained in the mucosal specimens, trial standard specimens for the concentration calibration were prepared. Acetylacetonate mixed with the elements (500 ppm for Cr, Ni and Zn; 40 ppm for Cu) was then mixed with monomers consisting of bisphenol A-glycidyl methacrylate and triethylene glycol dimethacrylate. The mixed monomers were polymerized to form a thin film shape and subjected to SR-XRF measurement at BL-4A in KEK-PF under the same measurement conditions<sup>S1</sup>. The fluorescent X-ray intensity of the standard specimens was normalized by the film thickness as shown in Table S2.

**Table S2** Fluorescence X-ray intensity of film-shaped concentration standards

|                                    | Ni   | Cu  | Zn    | Cr   |
|------------------------------------|------|-----|-------|------|
| Concentration (ppm)                | 497  | 41  | 497   | 502  |
| thickness (μm)                     | 134  | 82  | 133   | 169  |
| fluorescence X-ray intensity (cps) | 8596 | 812 | 12603 | 5545 |
| normalized intensity (cps/μm)      | 64   | 10  | 95    | 33   |

The concentrations of the accumulated elements were roughly estimated for three specimens (#C2 for the control, #2 for OLP, #12 for OLCL) and presented in Table S3 using the above-described calibration standards. The concentrations were estimated taking into consideration that the tissue specimen was sectioned at a thickness of 8 μm in thickness.

The elemental concentrations of sound buccal mucosa were previously estimated by PIXE and reported by Ishibashi et al.<sup>S2</sup> as follows (ppm in dry weight);

Ni: 7.86±21.23, Cu: 18.93±26.34, Zn: 66.19±30.41, Cr: 4.65±6.85

The estimated concentrations in Table S3 in the control specimens were similar to the above-reported values, whereas the concentration in OLCL was increased.

**Table S3** Estimated concentration (ppm) of Cr, Ni, Cu, and Zn in control, OLP, and OLCL

|             |         | Ni      | Cu      | Zn      | Cr      |
|-------------|---------|---------|---------|---------|---------|
| Control #C2 | Max     | 34.00   | 37.00   | 420.00  | 50.00   |
|             | Average | 10±3.3  | 15±3.1  | 70±42   | 19±6.0  |
| OLP #2      | Max     | 240.00  | 380.00  | >> 1000 | 350.00  |
|             | Average | 91±13   | 200±11  | 840±220 | 170±19  |
| OLCL #12    | Max     | >> 1000 | >> 1000 | >> 1000 | >> 1000 |
|             | Average | 89±14   | 190±160 | 770±150 | 190±550 |

## References

- [S1] Sugiyama, T., Uo, M., Wada, T. & Mori, Y. submitted for publication in *J. Synchrotron Rad.*  
 [S2] Ishibashi, S., Sugiyama, Y., Nakamura, M. & Sekiyama, S. (2003). The trace element analysis of normal oral mucosa. *Dent. J. Iwate Med. Univ.*, **28**, 76-84.
